# Supplementary material for: Rapid Classification and Identification of Microcystis aeruginosa Strains Using MALDI–TOF MS and Polygenetic Analysis
Source: PubMed Central journal article supplement (PMC4881969; doi:10.1371/journal.pone.0156275), 2016-05-26
Supplement: pone.0156275.s001.pdf [file pone.0156275.s001.pdf]

Table S1 *M. aeruginosa* stains information

| Strain number | Locality                             | Year | Remarks       |
|---------------|--------------------------------------|------|---------------|
| NIES-44       | Japan, Lake Kasumigaura              | 1974 | Cryopreserved |
| NIES-87       | Japan, Lake Kasumigaura              | 1982 | Cryopreserved |
| NIES-88       | Japan, Lake Kawaguchi                | 1981 | Cryopreserved |
| NIES-89       | Japan, Lake Kawaguchi                | 1981 | Cryopreserved |
| NIES-90       | Japan, Lake Kawaguchi                | 1981 | Cryopreserved |
| NIES-100      | Japan, Lake Suwa                     | 1982 | Cryopreserved |
| NIES-101      | Japan, Lake Suwa                     | 1982 | Cryopreserved |
| NIES-104      | Japan, Imperial Palace               | 1982 | Cryopreserved |
| NIES-105      | Japan, Lake Kasumigaura              | 1982 | Cryopreserved |
| NIES-107      | Japan, Lake Kawaguchi                | 1981 | Cryopreserved |
| NIES-109      | Japan, Lake Yogo                     | 1982 | Cryopreserved |
| NIES-111      | Japan, Lake Kasumigaura              | 1978 | Cryopreserved |
| NIES-112      | Japan, Lake Suwa                     | 1982 | Cryopreserved |
| NIES-478      | Japan, Lake Kasumigaura              | 1997 | Cryopreserved |
| NIES-604      | Japan, Lake Kasumigaura              | 1977 | Cryopreserved |
| NIES-843      | Japan, Lake Kasumigaura              | 1997 | Cryopreserved |
| NIES-901      | U.K. Scotland Dundee                 | 1997 | Cryopreserved |
| NIES-904      | Thailand                             | 1996 | -             |
| NIES-1043     | Germany, Brandenburg Neuglobsow      | 2000 | Cryopreserved |
| NIES-1053     | Japan, Lake Kasumigaura              | 1978 | Cryopreserved |
| NIES-1058     | Japan, Lake Kasumigaura              | 1978 | Cryopreserved |
| NIES-1061     | Japan, Lake Suwa                     | 1982 | Cryopreserved |
| NIES-1068     | Japan, Rokusuke-ike Pond             | 1982 | -             |
| NIES-1069     | Japan, Rokusuke-ike Pond             | 1982 | Cryopreserved |
| NIES-1070     | Japan, Rokusuke-ike Pond             | 1982 | Cryopreserved |
| NIES-1071     | Japan, Ichinomiya-machi              | 1982 | Cryopreserved |
| NIES-1076     | Japan, Lake Yogo                     | 1984 | Cryopreserved |
| NIES-1077     | Japan, Lake Yogo                     | 1984 | Cryopreserved |
| NIES-1085     | Japan, Shimane Matsue Koshi-ike Pond | 1984 | Cryopreserved |
| NIES-1094     | Japan, Lake Shirakaba                | 1984 | Cryopreserved |
| NIES-1099     | Japan, Noborio-ike Pond              | 1988 | Cryopreserved |
| NIES-1101     | Nepal, Kathmandu                     | 1988 | Cryopreserved |
| NIES-1104     | Japan, Lake Barato                   | 1989 | Cryopreserved |
| NIES-1105     | Japan, Lake Barato                   | 1989 | Cryopreserved |
| NIES-1113     | Japan, Lake Suwa                     | 1989 | Cryopreserved |
| NIES-1115     | Japan, Showa-tameike Pond            | 1989 | Cryopreserved |
| NIES-1126     | Japan, Lake Ohnuma                   | 1989 | Cryopreserved |
| NIES-1134     | Japan, Lake Teganuma                 | 1989 | Cryopreserved |
| NIES-1135     | Japan, Lake Teganuma                 | 1989 | Cryopreserved |
| NIES-1144     | Japan, Lake Okutama (1989-09-17)     | 1989 | Cryopreserved |
| NIES-1151     | Japan, Nagano Chino Lake Shirakaba   | 1989 | Cryopreserved |
| NIES-1157     | Japan, Lake Teganuma                 | 1989 | Cryopreserved |

|           |                                      |      |               |
|-----------|--------------------------------------|------|---------------|
| NIES-1170 | Japan, Lake Barato                   | 1990 | Cryopreserved |
| NIES-1211 | Japan Hokkaido Abashiri Lake Tofutsu | 1990 | -             |
| NIES-1213 | Japan Okinawa Yonaguni Kunma Dam     | 1990 | Cryopreserved |
| NIES-1215 | Japan Okinawa Yonaguni Kunma Dam     | 1990 | Cryopreserved |
| NIES-1216 | Japan Okinawa Yonaguni Kunma Dam     | 1990 | Cryopreserved |
| NIES-1217 | Japan Okinawa Yonaguni Kunma Dam     | 1990 | Cryopreserved |
| NIES-1218 | Japan, Kunma Dam                     | 1990 | Cryopreserved |
| NIES-1222 | Japan, Tatsugami Dam                 | 1990 | Cryopreserved |
| NIES-1224 | Japan, Tatsugami Dam                 | 1990 | Cryopreserved |
| NIES-1230 | Japan Okinawa Ishigaki Ishigaki Dam  | 1990 | Cryopreserved |
| NIES-1232 | Japan, Ishigaki Dam                  | 1990 | Cryopreserved |
| NIES-1233 | Japan, Ishigaki Dam                  | 1990 | Cryopreserved |
| NIES-1239 | Japan Okinawa Ishikawa Tengan Dam    | 1990 | Cryopreserved |

---

| Toxicity<br>(Microcysti | <i>mcy</i> G |
|-------------------------|--------------|
|-------------------------|--------------|

|   |   |
|---|---|
| - | - |
| - | - |
| + | + |
| + | + |
| + | + |
| - | - |
| - | - |
| - | - |
| - | - |
| + | + |
| - | - |
| - | - |
| + | + |
| - | - |
| + | + |
| - | - |
| - | - |
| + | + |
| - | - |
| + | + |
| + | + |
| + | + |
| - | - |
| - | - |
| + | + |
| - | - |
| - | - |
| + | + |
| - | + |
| - | - |
| + | + |
| - | + |
| - | + |
| - | - |
| + | + |
| - | + |

|   |   |
|---|---|
| - | - |
| - | - |
| + | + |
| + | + |
| - | - |
| - | - |
| - | - |
| + | + |
| - | - |
| + | + |
| - | - |
| - | - |
| - | - |

---
