# Supplementary material for: Rapid Classification and Identification of Microcystis aeruginosa Strains Using MALDI–TOF MS and Polygenetic Analysis
Source: PubMed Central journal article supplement (PMC4881969; doi:10.1371/journal.pone.0156275), 2016-05-26
Supplement: pone.0156275.s002.pdf [file pone.0156275.s002.pdf]

Table S 2 Ribosomal protein peak typing of 55 strains

| key        | L32 | S21 | L33 | L35 | S18 | L29 | L31 |
|------------|-----|-----|-----|-----|-----|-----|-----|
| NIES-843 A | 1   | 1   | 1   | 1   | 1   | 1   | 1   |
| NIES-88 (A | 1   | 0   | 0   | 0   | 1   | 6   | 0   |
| NIES-108 A | 1   | 1   | 0   | 0   | 1   | 6   | 1   |
| NIES-89 (A | 1   | 1   | 1   | 1   | 1   | 1   | 1   |
| NIES-107 A | 1   | 1   | 1   | 1   | 1   | 1   | 1   |
| NIES-105 A | 1   | 1   | 1   | 1   | 1   | 1   | 1   |
| NIES-90 (A | 1   | 1   | 1   | 1   | 1   | 1   | 1   |
| NIES-123 B | 2   | 1   | 1   | 1   | 1   | 2   | 2   |
| NIES-121 B | 1   | 1   | 1   | 2   | 1   | 2   | 2   |
| NIES-121 B | 2   | 1   | 1   | 2   | 1   | 2   | 2   |
| NIES-106 B | 1   | 1   | 1   | 2   | 1   | 2   | 2   |
| NIES-107 B | 1   | 1   | 1   | 2   | 1   | 2   | 2   |
| NIES-122 B | 2   | 1   | 0   | 2   | 1   | 2   | 2   |
| NIES-113 B | 1   | 1   | 1   | 2   | 0   | 2   | 2   |
| NIES-113 B | 1   | 1   | 1   | 2   | 0   | 2   | 2   |
| NIES-115 B | 1   | 1   | 1   | 2   | 0   | 2   | 2   |
| NIES-111 B | 1   | 1   | 1   | 2   | 1   | 2   | 2   |
| NIES-110 B | 2   | 1   | 0   | 2   | 1   | 2   | 2   |
| NIES-478 B | 2   | 1   | 1   | 3   | 1   | 2   | 2   |
| NIES-112 B | 0   | 1   | 0   | 0   | 1   | 2   | 2   |
| NIES-107 B | 2   | 1   | 1   | 2   | 1   | 7   | 2   |
| NIES-101 B | 2   | 1   | 1   | 2   | 1   | 0   | 2   |
| NIES-106 B | 2   | 1   | 0   | 1   | 1   | 0   | 2   |
| NIES-111 B | 1   | 1   | 1   | 2   | 1   | 7   | 2   |
| NIES-110 B | 2   | 1   | 0   | 2   | 1   | 2   | 1   |
| NIES-117 C | 1   | 1   | 0   | 0   | 1   | 4   | 0   |
| NIES-109 C | 0   | 1   | 1   | 1   | 1   | 4   | 0   |
| NIES-604 C | 0   | 1   | 0   | 0   | 1   | 2   | 0   |
| NIES-104 C | 0   | 1   | 0   | 2   | 1   | 7   | 0   |
| NIES-110 C | 1   | 1   | 0   | 0   | 1   | 4   | 0   |
| NIES-107 D | 0   | 1   | 0   | 2   | 1   | 6   | 0   |
| NIES-121 D | 0   | 1   | 1   | 0   | 0   | 6   | 1   |
| NIES-121 D | 0   | 0   | 1   | 0   | 0   | 6   | 1   |
| NIES-121 D | 0   | 1   | 0   | 0   | 0   | 0   | 0   |
| NIES-122 D | 0   | 0   | 0   | 2   | 0   | 7   | 0   |
| NIES-123 D | 0   | 0   | 0   | 0   | 1   | 6   | 1   |
| NIES-123 D | 0   | 0   | 0   | 0   | 1   | 7   | 1   |
| NIES-105 D | 0   | 1   | 1   | 2   | 1   | 6   | 0   |
| NIES-123 D | 0   | 1   | 1   | 2   | 1   | 6   | 1   |
| NIES-901 D | 0   | 1   | 0   | 0   | 1   | 6   | 1   |
| NIES-106 D | 0   | 1   | 1   | 3   | 0   | 6   | 1   |
| NIES-100 D | 1   | 1   | 1   | 0   | 0   | 6   | 1   |
| NIES-109 D | 0   | 1   | 1   | 0   | 0   | 6   | 1   |

|            |   |   |   |   |   |   |   |
|------------|---|---|---|---|---|---|---|
| NIES-111E  | 1 | 1 | 1 | 0 | 1 | 6 | 1 |
| NIES-44 (E | 1 | 1 | 1 | 0 | 1 | 6 | 1 |
| NIES-115E  | 1 | 1 | 0 | 0 | 1 | 2 | 1 |
| NIES-114E  | 0 | 0 | 0 | 0 | 0 | 0 | 3 |
| NIES-105E  | 1 | 0 | 0 | 0 | 0 | 0 | 3 |
| NIES-904E  | 0 | 0 | 0 | 0 | 0 | 0 | 3 |
| NIES-112E  | 0 | 0 | 1 | 0 | 0 | 0 | 3 |
| NIES-104N  | 1 | 1 | 0 | 1 | 1 | 0 | 1 |
| NIES-107N  | 1 | 1 | 1 | 0 | 1 | 1 | 1 |
| NIES-109N  | 2 | 1 | 1 | 0 | 1 | 2 | 2 |
| NIES-87 (O | 1 | 1 | 1 | 0 | 1 | 2 | 3 |
| NIES-121O  | 1 | 1 | 0 | 0 | 1 | 0 | 2 |
| PCC 7941-t | 1 | 1 | 1 | 2 | 1 | 2 | 2 |
| PCC 9432-t | 0 | 1 | 1 | 3 | 1 | 2 | 2 |
| PCC 9443-t | 0 | 1 | 1 | 3 | 1 | 3 | 2 |
| PCC 9701-t | 2 | 1 | 1 | 1 | 1 | 4 | 3 |
| PCC 9806-n | 1 | 1 | 1 | 1 | 1 | 3 | 1 |

| L28 | S17 | S16 | S19 | S15 | S20 | S14 | L24 | L17 |
|-----|-----|-----|-----|-----|-----|-----|-----|-----|
| 1   | 1   | 1   | 1   | 1   | 1   | 1   | 1   | 1   |
| 1   | 0   | 1   | 1   | 1   | 1   | 1   | 0   | 4   |
| 1   | 0   | 1   | 1   | 1   | 1   | 2   | 0   | 1   |
| 1   | 0   | 1   | 1   | 1   | 1   | 1   | 0   | 1   |
| 1   | 0   | 0   | 0   | 1   | 4   | 1   | 2   | 3   |
| 1   | 0   | 1   | 1   | 1   | 1   | 1   | 2   | 4   |
| 1   | 0   | 0   | 0   | 1   | 4   | 1   | 2   | 0   |
| 1   | 1   | 1   | 1   | 2   | 1   | 2   | 2   | 0   |
| 1   | 1   | 1   | 1   | 2   | 1   | 2   | 2   | 0   |
| 1   | 0   | 1   | 1   | 2   | 1   | 2   | 3   | 0   |
| 1   | 1   | 1   | 1   | 2   | 1   | 2   | 2   | 0   |
| 1   | 1   | 1   | 1   | 2   | 1   | 2   | 2   | 0   |
| 1   | 1   | 1   | 1   | 2   | 1   | 2   | 2   | 0   |
| 1   | 1   | 1   | 1   | 3   | 1   | 2   | 2   | 1   |
| 1   | 1   | 1   | 1   | 3   | 1   | 2   | 2   | 1   |
| 1   | 1   | 1   | 1   | 3   | 1   | 2   | 2   | 1   |
| 2   | 1   | 1   | 1   | 3   | 1   | 2   | 2   | 1   |
| 1   | 1   | 1   | 0   | 1   | 1   | 2   | 2   | 1   |
| 2   | 1   | 0   | 1   | 2   | 5   | 2   | 2   | 1   |
| 1   | 1   | 1   | 1   | 2   | 2   | 1   | 2   | 3   |
| 1   | 1   | 1   | 1   | 2   | 2   | 2   | 3   | 1   |
| 1   | 1   | 1   | 0   | 1   | 5   | 2   | 3   | 1   |
| 2   | 1   | 1   | 0   | 1   | 5   | 1   | 3   | 0   |
| 1   | 1   | 1   | 0   | 1   | 2   | 2   | 3   | 1   |
| 0   | 0   | 0   | 1   | 2   | 3   | 1   | 2   | 3   |
| 2   | 1   | 1   | 1   | 2   | 2   | 0   | 1   | 4   |
| 2   | 1   | 1   | 1   | 2   | 4   | 0   | 0   | 3   |
| 2   | 0   | 1   | 1   | 2   | 4   | 1   | 0   | 3   |
| 2   | 0   | 1   | 1   | 2   | 4   | 2   | 0   | 0   |
| 2   | 1   | 1   | 1   | 1   | 4   | 0   | 0   | 2   |
| 1   | 0   | 0   | 1   | 1   | 1   | 1   | 0   | 0   |
| 1   | 1   | 0   | 1   | 1   | 5   | 2   | 0   | 0   |
| 0   | 0   | 0   | 1   | 1   | 5   | 0   | 0   | 0   |
| 0   | 0   | 0   | 1   | 1   | 5   | 0   | 0   | 0   |
| 0   | 0   | 0   | 1   | 1   | 5   | 0   | 0   | 0   |
| 0   | 0   | 0   | 1   | 1   | 5   | 0   | 0   | 0   |
| 0   | 0   | 0   | 1   | 1   | 5   | 0   | 0   | 0   |
| 1   | 1   | 0   | 1   | 1   | 5   | 2   | 0   | 0   |
| 1   | 1   | 0   | 1   | 1   | 5   | 2   | 0   | 0   |
| 1   | 1   | 0   | 1   | 1   | 5   | 1   | 0   | 0   |
| 1   | 0   | 0   | 1   | 1   | 5   | 2   | 0   | 2   |
| 0   | 0   | 0   | 1   | 1   | 5   | 0   | 0   | 0   |
| 0   | 0   | 1   | 1   | 2   | 5   | 0   | 0   | 0   |

|   |   |   |   |   |   |   |   |   |
|---|---|---|---|---|---|---|---|---|
| 1 | 0 | 1 | 1 | 1 | 1 | 0 | 3 | 3 |
| 1 | 0 | 1 | 1 | 1 | 1 | 0 | 0 | 3 |
| 1 | 1 | 1 | 1 | 1 | 1 | 2 | 0 | 1 |
| 1 | 0 | 0 | 0 | 2 | 2 | 0 | 0 | 0 |
| 0 | 0 | 0 | 0 | 2 | 2 | 0 | 0 | 0 |
| 3 | 0 | 0 | 0 | 2 | 2 | 0 | 0 | 0 |
| 0 | 0 | 0 | 0 | 2 | 2 | 0 | 0 | 0 |
| 1 | 0 | 1 | 1 | 1 | 1 | 1 | 2 | 0 |
| 1 | 0 | 1 | 1 | 1 | 1 | 1 | 0 | 1 |
| 1 | 1 | 1 | 1 | 2 | 2 | 1 | 3 | 1 |
| 2 | 1 | 0 | 1 | 1 | 1 | 2 | 3 | 3 |
| 1 | 1 | 0 | 1 | 1 | 1 | 2 | 3 | 3 |
| 2 | 1 | 1 | 1 | 2 | 1 | 2 | 2 | 1 |
| 1 | 1 | 1 | 1 | 2 | 2 | 2 | 2 | 2 |
| 3 | 1 | 1 | 1 | 2 | 3 | 2 | 3 | 3 |
| 1 | 2 | 2 | 1 | 1 | 4 | 2 | 4 | 4 |
| 1 | 1 | 2 | 1 | 3 | 5 | 2 | 3 | 1 |

| L22 | L18 | L14 | L19 | S12 | S13 |
|-----|-----|-----|-----|-----|-----|
| 1   | 1   | 1   | 1   | 1   | 1   |
| 1   | 1   | 1   | 1   | 1   | 1   |
| 2   | 0   | 1   | 1   | 1   | 1   |
| 1   | 1   | 1   | 1   | 1   | 1   |
| 2   | 1   | 1   | 0   | 1   | 1   |
| 1   | 1   | 1   | 1   | 1   | 1   |
| 2   | 4   | 1   | 0   | 1   | 1   |
| 2   | 1   | 1   | 1   | 1   | 1   |
| 2   | 1   | 1   | 2   | 1   | 0   |
| 2   | 1   | 1   | 3   | 1   | 1   |
| 2   | 1   | 1   | 3   | 1   | 1   |
| 2   | 2   | 1   | 1   | 1   | 1   |
| 1   | 0   | 1   | 3   | 1   | 1   |
| 2   | 1   | 1   | 1   | 1   | 1   |
| 2   | 1   | 1   | 1   | 1   | 1   |
| 2   | 1   | 1   | 1   | 1   | 1   |
| 2   | 1   | 1   | 2   | 1   | 1   |
| 2   | 1   | 1   | 2   | 1   | 1   |
| 2   | 1   | 1   | 2   | 1   | 1   |
| 1   | 0   | 1   | 2   | 0   | 1   |
| 2   | 1   | 1   | 2   | 1   | 1   |
| 2   | 2   | 1   | 2   | 1   | 1   |
| 2   | 2   | 0   | 0   | 1   | 1   |
| 2   | 2   | 1   | 2   | 1   | 1   |
| 2   | 4   | 0   | 1   | 1   | 1   |
| 2   | 0   | 1   | 1   | 1   | 1   |
| 2   | 0   | 1   | 1   | 1   | 1   |
| 1   | 0   | 1   | 1   | 1   | 1   |
| 1   | 1   | 1   | 1   | 1   | 1   |
| 2   | 0   | 0   | 0   | 1   | 1   |
| 2   | 0   | 1   | 0   | 0   | 1   |
| 1   | 0   | 1   | 0   | 1   | 1   |
| 1   | 0   | 1   | 0   | 0   | 0   |
| 0   | 0   | 1   | 0   | 1   | 1   |
| 0   | 0   | 1   | 0   | 0   | 0   |
| 0   | 0   | 1   | 0   | 1   | 1   |
| 0   | 0   | 1   | 0   | 0   | 1   |
| 0   | 3   | 1   | 0   | 1   | 0   |
| 0   | 3   | 1   | 0   | 1   | 0   |
| 0   | 3   | 1   | 0   | 1   | 0   |
| 1   | 0   | 0   | 2   | 1   | 0   |
| 1   | 0   | 1   | 0   | 0   | 0   |
| 1   | 0   | 1   | 2   | 0   | 0   |

|   |   |   |   |   |   |
|---|---|---|---|---|---|
| 2 | 1 | 1 | 1 | 1 | 1 |
| 2 | 1 | 1 | 1 | 1 | 1 |
| 2 | 4 | 1 | 1 | 1 | 1 |
| 1 | 0 | 0 | 2 | 0 | 0 |
| 1 | 0 | 0 | 2 | 0 | 0 |
| 1 | 0 | 0 | 2 | 0 | 0 |
| 1 | 0 | 0 | 2 | 0 | 0 |
| 1 | 1 | 0 | 1 | 1 | 1 |
| 1 | 1 | 1 | 1 | 1 | 1 |
| 2 | 0 | 1 | 2 | 0 | 1 |
| 2 | 0 | 1 | 2 | 0 | 1 |
| 0 | 2 | 0 | 0 | 1 | 1 |
| 2 | 2 | 1 | 2 | 1 | 1 |
| 2 | 1 | 1 | 2 | 1 | 1 |
| 2 | 3 | 1 | 1 | 1 | 1 |
| 2 | 1 | 1 | 1 | 1 | 1 |
| 2 | 4 | 1 | 3 | 1 | 1 |
